# Supplementary material
Source: Research Square preprint supplement (doi:10.21203/rs.3.rs-8999508/v1)
Supplement: Supplementary file 1 [file 1ec3eef5889039e93d32737d.docx]

**Supplementary material**

**Table S1** Structure, CAS and formula of 4-Alkyl branched-chain fatty acids

| **BCFAs** | **Structure** | **CAS** | **Formula** |
| --- | --- | --- | --- |
| MOA(4-Me-8:0) | 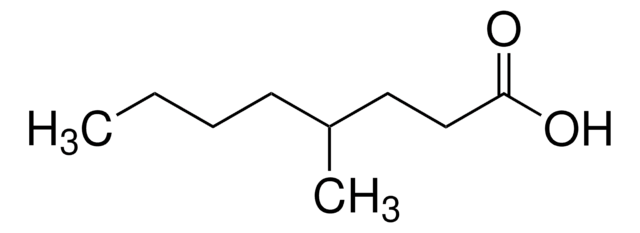 | 54947-74-9 | C9H18O2 |
| EOA(4-Et-8:0) | 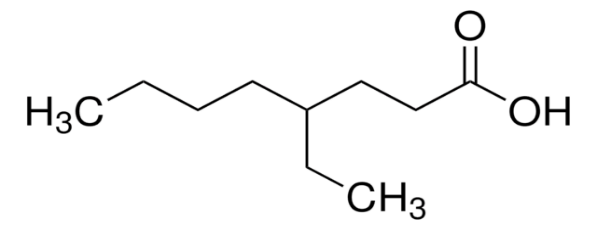 | 16493-80-4 | C10H20O2 |
| MNA(4-Me-9:0) | 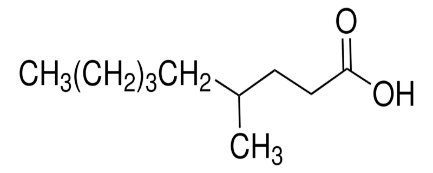 | [45019-28-1](https://www.chembk.com/cn/chem/45019-28-1) | [C10H20O2](https://www.chembk.com/cn/search/C10H20O2) |

**Table S2** Accuracy and precision assessment of individual branched-chain fatty acids (4-Me-8:0, 4-Et-8:0, and 4-Me-9:0) at a concentration of 40 μg/mL based on triplicate measurements recorded on GC-MS

| **BCFAs** | **Measured value（μg/mL）** | **Accuracy（%）** | **Precision**  **(% RSD)** |
| --- | --- | --- | --- |
| 4-Me-8:0 | 38.66 | 3.35 | 3.40 |
| 4-Et-8:0 | 37.82 | 5.45 | 2.55 |
| 4-Me-9:0 | 38.28 | 4.30 | 1.78 |

**Table S3** Statistical analysis (ANOVA) of quantification values to assess repeatability at a concentration of 40 μg/mL for standard branched-chain fatty acids (4-Me-8:0, 4-Et-8:0, and 4-Me-9:0)

|  | **F** | **p-value** | **F crit** |
| --- | --- | --- | --- |
| **Comparative result for 4-Me-8:0, 4-Et-8:0, and 4-Me-9:0** | 2.327 | 0.151 | 4.07 |

F: the ratio of between-group variance to within-group variance, used to test whether multiple group means differ significantly;

F crit: the critical threshold of the F-distribution at a given significance level and degrees of freedom.

**Table S4** Statistical analysis (One-Way ANOVA) for quantification of individual standard branched chain fatty acids at different concentrations 1μg/mL, 5μg/mL, 10μg/mL,20μg/mL, 30μg/mL, and 40μg/mL with triplicate measurements to assess the deviation

| **Concentration（μg/mL）** | **F** | ***P*-value** | **F crit** |
| --- | --- | --- | --- |
| 40 | 0.288 | 0.837 | 4.07 |
| 30 | 1.349 | 0.642 | 4.07 |
| 20 | 2.332 | 0.336 | 4.07 |
| 10 | 0.998 | 0.547 | 4.07 |
| 5 | 0.679 | 0.478 | 4.07 |
| 1 | 1.223 | 0.223 | 4.07 |

F: the ratio of between-group variance to within-group variance, used to test whether multiple group means differ significantly;

F crit: the critical threshold of the F-distribution at a given significance level and degrees of freedom.

**Table S5** Quantification results, Accuracy and precision (%RSD) for mixed standard branched-chain fatty acids samples at various concentrations 1 μg/mL, 5 μg/mL, 10 μg/mL, 20 μg/mL, 30 μg/mL, and 40μg/mL performed by using GC-MS

| **Concentration（μg/mL）** | **4-Me-8:0** | | | **4-Et-8:0** | | | **4-Me-9:0** | | |
| --- | --- | --- | --- | --- | --- | --- | --- | --- | --- |
| Measured value（μg/mL） | Accuracy（%） | Precision  (% RSD) | Measured value（μg/mL） | Accuracy（%） | Precision  (% RSD) | Measured value（μg/mL） | Accuracy（%） | Precision  (% RSD) |
| 40 | 41.31±1.72 | -3.28 | 4.24 | 38.52±1.56 | 3.70 | 4.08 | 44.01±2.58 | 10.03 | 5.88 |
| 30 | 31.94±2.14 | -4.85 | 6.86 | 31.43±2.24 | -3.80 | 7.22 | 28.97±0.88 | 2.58 | 3.06 |
| 20 | 21.87±1.36 | -4.68 | 6.44 | 20.81±0.89 | -2.03 | 4.38 | 20.45±0.57 | -1.13 | 2.83 |
| 10 | 11.33±1.04 | -3.33 | 9.79 | 10.54±0.52 | -1.35 | 5.12 | 11.88±0.86 | -4.70 | 7.30 |
| 5 | 4.90±0.08 | 0.25 | 1.90 | 4.86±0.13 | 0.35 | 2.87 | 5.16±0.15 | -0.40 | 2.97 |
| 1 | 1.06±0.02 | -0.15 | 7.62 | 1.06±0.08 | -0.15 | 13.20 | 1.16±0.12 | -0.40 | 11.08 |

**Table S6** Statistical analysis (Two-Way ANOVA) of quantification values for the specificity analysis of 4-Me-8:0, 4-Et-8:0, and 4-Me-9:0 at various concentrations (1 μg/mL, 5 μg/mL, 10 μg/mL, 20 μg/mL, 30 μg/mL, and 40μg/mL) in individual and mixed solution

|  | **F** | ***P*-value** | **F crit** |
| --- | --- | --- | --- |
| 4-Me-8:0 | 3.298 | 0.335 | 6.554 |
| 4-Et-8:0 | 1.239 | 0.289 | 6.554 |
| 4-Me-9:0 | 1.098 | 1.442 | 6.554 |

F: the ratio of between-group variance to within-group variance, used to test whether multiple group means differ significantly;

F crit: the critical threshold of the F-distribution at a given significance level and degrees of freedom.

**Table S7** Quantification results for repeatability assessment of standard branched-chain fatty acids (4-Me-8:0, 4-Et-8:0, and 4-Me-9:0) acquired by different operators at a concentration of 40 μg/mL

| **BCFAs** | **Measured value（μg/mL）** | **Accuracy（%）** | **Precision**  **(% RSD)** |
| --- | --- | --- | --- |
| 4-Me-8:0 | 39.84 | 0.40 | 1.51 |
| 4-Et-8:0 | 37.75 | 5.63 | 1.30 |
| 4-Me-9:0 | 38.76 | 3.10 | 1.92 |

**Table S8** Statistical analysis (ANOVA) of quantification values to assess repeatability at a concentration of 40 μg/mL for standard branched-chain fatty acids (4-Me-8:0, 4-Et-8:0, and 4-Me-9:0)

|  | **F** | ***P*-value** | **F crit** |
| --- | --- | --- | --- |
| **Comparative result for 4-Me-8:0, 4-Et-8:0, and 4-Me-9:0** | 1.407 | 0.990 | 5.143 |

F: the ratio of between-group variance to within-group variance, used to test whether multiple group means differ significantly;

F crit: the critical threshold of the F-distribution at a given significance level and degrees of freedom.

**Table S9** Quantification results for reproducibility assessment of standard branched-chain fatty acids (4-Me-8:0, 4-Et-8:0, and 4-Me-9:0) acquired at a concentration of 40 μg/mL

| **BCFAs** | **Measured value（μg/mL）** | **Accuracy（%）** | **Precision**  **(% RSD)** |
| --- | --- | --- | --- |
| 4-Me-8:0 | 41.90 | -4.75 | 3.23 |
| 4-Et-8:0 | 39.39 | 1.53 | 4.37 |
| 4-Me-9:0 | 38.76 | 3.1 | 3.45 |

**Table S10** Statistical analysis (ANOVA) of quantification values to assess reproducibility at a concentration of 40 μg/mL for standard branched-chain fatty acids (4-Me-8:0, 4-Et-8:0, and 4-Me-9:0)

|  | **F** | ***P*-value** | **F crit** |
| --- | --- | --- | --- |
| **Comparative result for 4-Me-8:0, 4-Et-8:0, and 4-Me-9:0** | 4.097 | 0.113 | 7.71 |

F: the ratio of between-group variance to within-group variance, used to test whether multiple group means differ significantly;

F crit: the critical threshold of the F-distribution at a given significance level and degrees of freedom.


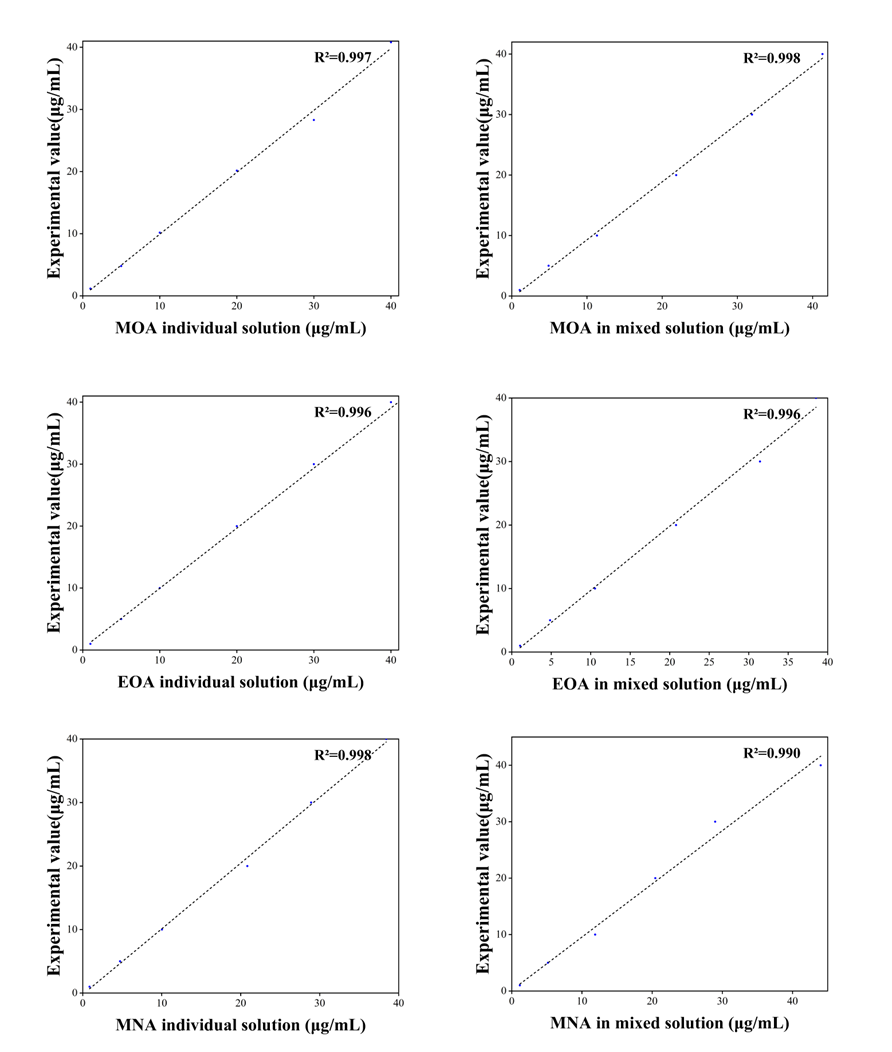


**Figure S1** Linear plots of measured versus true values of MOA, EOA, and MNA at different concentrations of each individual standard branched-chain fatty acids, and of MOA, 4-ethyl octanoic acid, and MNA at different concentrations in mixed solutions.
